1

2

3 **Non-COVID-19 patients in times of pandemic: decreased emergency department**  
4 **visits and increased out-of-hospital mortality in Northern Italy**

5

6 **Authors:**

7 Luca Santi MD <sup>1</sup>, Davide Golinelli MD <sup>2</sup>, Andrea Tampieri MD <sup>3</sup>, Gabriele Farina MD <sup>1</sup>, Manfredi  
8 Greco <sup>2</sup>, Simona Rosa MSc <sup>2</sup>, Michelle Beleffi MD <sup>4</sup>, Bianca Biavati MD <sup>4</sup>, Francesca Campinoti  
9 MD <sup>4</sup>, Stefania Guerrini MD <sup>1</sup>, Rodolfo Ferrari MD <sup>3</sup>, Paola Rucci, PhD <sup>2</sup>, Maria Pia Fantini MD <sup>2</sup>,  
10 Fabrizio Giostra MD <sup>1</sup>.

11 <sup>1</sup> Department of Emergency, Medicina d'Urgenza e Pronto Soccorso, Policlinico S. Orsola-  
12 Malpighi, Bologna, Italy

13 <sup>2</sup> Department of Biomedical and Neuromotor Sciences (DIBINEM), Alma Mater Studiorum -  
14 University of Bologna. Via San Giacomo 12, 40126, Bologna, Italy.

15 <sup>3</sup> Department of Emergency, Medicina d'Urgenza e Pronto Soccorso. Ospedale S. Maria della  
16 Scaletta, Imola, Italy

17 <sup>4</sup> Alma Mater Studiorum - Università di Bologna

18

19 **Authors' affiliations:**

20 Luca Santi, MD: Policlinico S. Orsola-Malpighi. Dipartimento dell'Emergenza-Urgenza. Unità  
21 operativa di Medicina d'urgenza e Pronto Soccorso. Via Giuseppe Massarenti, 9, 40138, Bologna,  
22 Italy. [lucasanti@hotmail.it](mailto:lucasanti@hotmail.it)

23

24 Davide Golinelli, MD: Dipartimento di Scienze Biomediche e Neuromotorie, Alma Mater  
25 Studiorum – Università di Bologna. Via San Giacomo 12, 40126, Bologna, Italy.

26 [davide.golinelli@unibo.it](mailto:davide.golinelli@unibo.it)

27 ORCID: 0000-0001-7331-9520

28 Andrea Tampieri MD: Ospedale S. Maria della Scaletta. Dipartimento di Emergenza-urgenza e  
29 Accettazione. Unità Operativa di Pronto Soccorso e Medicina d'Urgenza. Viale Amendola, 2 –  
30 40026 Imola, Italy. [a.tampieri@ausl.imola.bo.it](mailto:a.tampieri@ausl.imola.bo.it)

31

32 Gabriele Farina MD: Policlinico S. Orsola-Malpighi. Dipartimento dell'Emergenza-Urgenza. Unità  
33 operativa di Medicina d'urgenza e Pronto Soccorso. Via Giuseppe Massarenti, 9, 40138, Bologna,  
34 Italy. [gabriele.farina@aosp.bo.it](mailto:gabriele.farina@aosp.bo.it)

35

36 Manfredi Greco: Dipartimento di Scienze Biomediche e Neuromotorie, Alma Mater Studiorum –  
37 Università di Bologna. Via San Giacomo 12, 40126, Bologna, Italy. [manfredi.greco@studio.unibo.it](mailto:manfredi.greco@studio.unibo.it)

38

39 Simona Rosa, MSc: Dipartimento di Scienze Biomediche e Neuromotorie, Alma Mater Studiorum –  
40 Università di Bologna. Via San Giacomo 12, 40126, Bologna, Italy. [simona.rosa@unibo.it](mailto:simona.rosa@unibo.it)

41

42 Michelle Beleffi MD: Alma Mater Studiorum - Università di Bologna. Via Zamboni, 33 - 40126  
43 Bologna, Italy. [michellebeleffi@gmail.com](mailto:michellebeleffi@gmail.com)

44

45 Bianca Biavati MD:Alma Mater Studiorum - Università di Bologna. Via Zamboni, 33 - 40126  
46 Bologna, Italy. [biavati.bianca@gmail.com](mailto:biavati.bianca@gmail.com)

47

48 Francesca Campinoti MD:Alma Mater Studiorum - Università di Bologna. Via Zamboni, 33 - 40126  
49 Bologna, Italy. [campinotifrancesca@gmail.com](mailto:campinotifrancesca@gmail.com)

50

51 Stefania Guerrini MD: Policlinico S. Orsola-Malpighi. Dipartimento dell’Emergenza-Urgenza.  
52 Unità operativa di Medicina d’urgenza e Pronto Soccorso. Via Giuseppe Massarenti, 9, 40138,  
53 Bologna, Italy.

54 [stefania.guerrini@aosp.bo.it](mailto:stefania.guerrini@aosp.bo.it)

55

56 Rodolfo Ferrari MD: Ospedale S. Maria della Scaletta. Dipartimento di Emergenza-urgenza e  
57 Accettazione. Unità Operativa di Pronto Soccorso e Medicina d’Urgenza. Viale Amendola, 2 –  
58 40026 Imola, Italy. [r.ferrari@ausl.imola.bo.it](mailto:r.ferrari@ausl.imola.bo.it)

59

60 Paola Rucci, PhD: Dipartimento di Scienze Biomediche e Neuromotorie, Alma Mater Studiorum –  
61 Università di Bologna. Via San Giacomo 12, 40126, Bologna, Italy. [paola.rucci2@unibo.it](mailto:paola.rucci2@unibo.it)

62 ORCID: 0000-0002-7704-0831

63

64 Maria Pia Fantini, MD: Dipartimento di Scienze Biomediche e Neuromotorie, Alma Mater  
65 Studiorum – Università di Bologna. Via San Giacomo 12, 40126, Bologna, Italy.

66 [mariapia.fantini@unibo.it](mailto:mariapia.fantini@unibo.it)

67 ORCID: 0000-0002-3257-6552

68

69 Fabrizio Giostra MD: Policlinico S. Orsola-Malpighi. Dipartimento dell’Emergenza-Urgenza. Unità  
70 operativa di Medicina d’urgenza e Pronto Soccorso. Via Giuseppe Massarenti, 9, 40138, Bologna,  
71 Italy.

72 [fabrizio.giostra@aosp.bo.it](mailto:fabrizio.giostra@aosp.bo.it)

73

#### 74 **Corresponding author**

75 Luca Santi, MD: Policlinico S. Orsola-Malpighi. Dipartimento dell’Emergenza-Urgenza. Unità  
76 operativa di Medicina d’urgenza e Pronto Soccorso. Via Giuseppe Massarenti, 9, 40138, Bologna,  
77 Italy. email: [lucasanti@hotmail.it](mailto:lucasanti@hotmail.it) Tel: + 39 0512143324

78            **Non-COVID-19 patients in times of pandemic: decreased Emergency**  
79            **Department visits and increased out-of-hospital mortality in Northern Italy**

80

81

82            **Abstract**

83            **Objective.** The aim of this was to assess the short-term impact of the pandemic on non-COVID-19  
84 patients living in a one-million inhabitants area in Northern Italy (Bologna Metropolitan Area-  
85 BMA), analyzing time trends of Emergency Department (ED) visits, hospitalizations and mortality.

86            **Methods.** We conducted a retrospective observational study using data extracted from BMA  
87 healthcare informative systems. Weekly trends of ED visits, hospitalizations, in- and out-of-  
88 hospital, all-cause and cause-specific mortality between December 1<sup>st</sup>, 2019 to May 31<sup>st</sup>, 2020, were  
89 compared with those of the same period of the previous year, using Joinpoint regression models and  
90 incidence rate ratios.

91            **Results.** Non-COVID-19 ED visits and hospitalizations showed a stable trend until the first Italian  
92 case of COVID-19 has been recorded, on February 19<sup>th</sup>, 2020, when they dropped simultaneously.  
93 The reduction of ED visits was observed in all age groups and across all severity and diagnosis  
94 groups. In the lockdown period a significant increase was found in overall out-of-hospital mortality  
95 (43.2%) and cause-specific out-of-hospital mortality related to neoplasms (76.7%), endocrine,  
96 nutritional and metabolic (79.5%) as well as cardiovascular (32.7%) diseases.

97            **Conclusions.** The pandemic caused a sudden drop of ED visits and hospitalizations of non-COVID-  
98 19 patients during the lockdown period, and a concurrent increase in out-of-hospital mortality  
99 mainly driven by deaths for neoplasms, cardiovascular and endocrine diseases. The findings of this

100 study might be useful to understand both the population reaction and the healthcare system response  
101 at the early phases of the pandemic in terms of reduced demand of care and systems capability in  
102 intercepting it.

103

## 104 **Introduction**

### 105 **Background**

106 Globally, the Coronavirus Disease (COVID-19) pandemic represents a dramatic burden for  
107 healthcare services. Italy was the first Western country affected by the pandemic. The first case of  
108 local transmission of Severe Acute Respiratory Syndrome Coronavirus 2 (SARS-CoV-2) in Italy  
109 was confirmed in a thirty eight-year-old man in the municipality of Codogno (Lombardy region) on  
110 February 19<sup>th</sup>, 2020<sup>1</sup>, while on February 21<sup>st</sup>, a resident of Vo', a small town near Padua (Veneto  
111 Region), died of pneumonia due to SARS-CoV-2 infection.<sup>2,3</sup> In the following weeks, an  
112 exponential growth in the number of cases and deaths in the neighboring regions of northern Italy  
113 was observed. As a consequence, the national government enforced as containment measures a  
114 complete country lockdown on March 10<sup>th</sup>, 2020: at that stage the confirmed cases in Italy were  
115 10,149 and deaths 631.<sup>4</sup> Hospitals and Emergency Departments (EDs) were forced to rapidly adjust  
116 to this completely new situation in order to manage an extraordinarily high number of contagious  
117 patients with respiratory symptoms.<sup>5</sup>

118

### 119 **Importance**

120 However, something else changed due to the pandemic as rapidly as the spread of SARS-CoV-2. As  
121 a matter of fact, the pandemic determined a sudden and significant reduction of non-COVID-19

122 patients seeking for treatment due to urgent medical conditions.<sup>6</sup> This reduction in ED visits might  
123 impact the health status of non-COVID patients with acute and chronic diseases.<sup>7</sup>

124 In order to better understand this phenomenon and its possible consequences, we retrospectively  
125 analyzed amount and type of ED visits, hospitalizations and mortality during lockdown and the  
126 preceding and following periods, in the metropolitan area of Bologna (BMA) (~1,000,000  
127 inhabitants), which is the principal town of one of the first and most affected region of Italy and  
128 Europe, Emilia Romagna.

129 We hypothesized that trends of ED visits might have been influenced by age, as school closure and  
130 social distancing measures might have differently impacted on young and elderly health needs.  
131 Moreover, the reduction of ED accesses due to fear of contagion and favored by the “stay at home”  
132 message launched on general and social media might also have differently affected the severity  
133 pattern of ED accesses. Indeed, we predicted a significant reduction of less severe conditions  
134 referring to EDs, whereas no decrease of emergency conditions was expected, including the need of  
135 urgent surgical intervention or ICU treatment. We also expected at least a progressive return of ED  
136 accesses and hospitalizations to the pre-COVID-19 era levels during the post lockdown phase. No  
137 remarkable changes in all-cause and cause-specific mortality, and in the place of death were  
138 hypothesized.

139

#### 140 **Goals of the investigation**

141 Our first aim was to compare time trends of ED visits, hospitalizations, in- and out-of-hospital all-  
142 cause and cause-specific mortality of non-COVID-19 patients during the first months of the  
143 pandemic with the same period of 2019, as possible indicators of unmet healthcare needs.

144 The secondary aim was to subdivide ED patients by age, diagnosis and illness severity, compare  
145 their trends, and analyze hospitalizations' trends, focusing on the receiving hospital department  
146 (surgical department, medical department, intensive care unit (ICU)).

147

## 148 **Methods**

### 149 **Study design, population and setting**

150 We conducted a retrospective observational study using anonymous data extracted from the  
151 healthcare administrative databases and informative systems of BMA, Northern Italy.

152 The study population consisted of all age residents in BMA, which encompasses the city of  
153 Bologna and the neighboring municipalities, for a total of 1,019,875 citizens as of January 1<sup>st</sup>,  
154 2020.<sup>8</sup> The demographic characteristics of the population are reported in Table 1 [Suppl mat].

155 In the BMA, the first patient reported with SARS-CoV-2 infection was recorded on February 28<sup>th</sup>.

156 On May 31<sup>st</sup>, the number of infected patients was 5,021 with 684 deaths.<sup>4</sup>

157 The BMA healthcare system consists of twelve hospitals equipped with EDs. Among these, four are  
158 located in the urban area and two of these are large university hospitals, four are suburban whereas  
159 the last four are rural hospitals. The volume of patients annually assessed in the different EDs  
160 ranges from ~3,000 up to ~150,000 in 2019.

161 This study follows the STROBE reporting guidelines for observational studies.

162

### 163 **Study data**

164 We examined the weekly trends of ED visits, hospitalizations of patients admitted from ED and in-  
165 and out-of-hospital all-cause and cause-specific mortality between December 1<sup>st</sup>, 2019 to May 31<sup>st</sup>,  
166 2020, and compared them with the trends of the same period of the previous year.

167 The study period was subdivided into four periods, starting from the beginning of the flu peak up to  
168 four weeks after the end of the national lockdown. Namely, the following are the four subgroups of  
169 the study period:

170 • flu period (from December 1<sup>st</sup>, 2019 to February 23<sup>rd</sup>, 2020the outbreak of the COVID-19  
171 pandemic to the first containment measures, i.e. from the beginning of the flu period to week 49<sup>th</sup>  
172 2019 to week 8<sup>th</sup> 2020);

173 • pre-lockdown period (from the initial alarm period in the absence of containment institutional  
174 measures until the lockdown institution, i.e. February 24<sup>th</sup>, 2020 to March 9<sup>th</sup>, 2020, weeks 9<sup>th</sup> to  
175 10<sup>th</sup> 2020);

176 • lockdown period (March 10<sup>th</sup>, 2020 to May 3<sup>rd</sup>, 2020, weeks 11<sup>th</sup> to 18<sup>th</sup> 2020);

177 • post-lockdown period (i.e. the reopening period, from the May 4<sup>th</sup>, 2020 to May 31<sup>st</sup>, 2020, week  
178 19<sup>th</sup> to 22<sup>nd</sup> 2020).

179 The data sources include the Emergency Department Database, the mortality registry updated to  
180 June 2020 and the Civil Protection Database.<sup>4</sup> For the purpose of the present study, the data  
181 extracted from the diverse databases were the following: weekly number of ED visits, type of ED  
182 visits (main diagnosis, severity code), patients characteristics (age, gender), weekly number of  
183 hospitalizations, department of hospitalization (medical, surgical, ICU), weekly number of deaths,  
184 cause of death (main diagnosis) and place of death (in-hospital, out-of-hospital).

185 The main diagnosis of ED visits and deaths was coded through the International Classification of  
186 Diseases Clinical Modification Ninth (ICD-9-CM) and Tenth (ICD-10-CM) versions, respectively.



187 Non-COVID-19 cases were identified by excluding the COVID-19 cases diagnosed by the  
188 emergency physician as suspected or confirmed (ICD-9-CM codes  
189 480,480.3,079.82,V01.82,V01.79), in primary or secondary diagnosis of discharged and  
190 hospitalized patients. For all mortality data, the specific codes related to COVID-19 and SARS-  
191 CoV-2 infection (U00-U85) were ruled out.

192

### 193 **Analysis**

194 The demographic and clinical characteristics of the population were summarized using mean and  
195 standard deviation or absolute and percentage frequencies.

196 We analyzed and displayed trends of ED visits, hospital admissions, and mortality, divided into the  
197 four time periods and compared them with those of the same periods of the previous year.

198 The trends of ED visits, hospitalizations and all-cause mortality were analyzed using the Joinpoint  
199 Trend Analysis Software 4.6.0.0 (Statistical Research and Applications Branch, National Cancer  
200 Institute, USA).<sup>9</sup> Joinpoint models allowed to identify changes in the slopes of ED visits and  
201 hospitalizations during the periods of interest.

202 We carried out a preliminary analysis comparing the time trend of ED visits, hospitalizations and  
203 mortality rates in 2019 with those of the years 2014-2018. This analysis showed no significant  
204 changes in ED visits, hospitalizations and mortality overtime. Therefore, we considered 2019 as the  
205 reference year.

206 For what concerns age of non-COVID-19 ED patients during pandemic, it was classified into three  
207 groups: pediatric patients (0-14 years), adults (15-64 year) and elderly ( $\geq 65$  years). We also  
208 classified ED visits according to the triage code (red, yellow, green and white) and by ICD-9-CM  
209 disease category and specific cause.

210 Then, we compared the trends of admissions to hospital departments between 2019 and 2020.

211 We also analyzed the trends of all-cause, cause-specific and in-hospital (public or private) and out-  
212 of-hospital (home, social welfare structure, other) mortality between 2019 and 2020. The latter was  
213 also split into cause-specific out-of-hospital mortality.

214 Incidence rate ratios (IRRs) of hospitalizations and mortality in 2020 vs. 2019 were estimated using  
215 Poisson regression models.

216

## 217 **Ethical Approval**

218 The study was approved by the Emilia Romagna AVEC Ethical Committee on August 3<sup>rd</sup>, 2020.

219

## 220 **Results**

221 The empirical trends of ED visits, hospitalizations and mortality in 2019 and 2020 are reported in  
222 Figure 1.

223

### 224 **ED visits**

225 Figure 1a shows that the number of ED visits was almost stable in the year 2019 until the end of  
226 2020 flu period, when it dropped simultaneously with the exponential growth of the local SARS-  
227 CoV-2 case curve. Then, during the lockdown period the number of ED visits started to rise, but  
228 with a slower pace when compared to the previous decrease.

229 Joinpoint analysis showed a significant ( $p < 0.05$ ) reduction in ED visits starting from week nine  
230 (pre-lockdown period), leading to the lowest numbers at the thirteenth week during lockdown, then

231 followed again by a significant increase ( $p<0.05$ ) at the fourteenth week. During the lockdown  
232 period the overall reduction in ED visits compared to same period of the previous year was -66.2%  
233 (Table 2 [Suppl mat]). ED accesses' decrease occurred during the steep climb of COVID-19 spread  
234 until the peak. The subsequent slow increase in ED visits never returned to the previous year levels,  
235 not even at the end of the study period, four weeks after the end of the national lockdown.

236 The impressive reduction in the number of ED visits was found in all age groups, throughout all  
237 study periods (except for the flu period) (Table 3 [Suppl mat]). The highest decrease was observed  
238 in pediatric patients during lockdown (-83.2%), although even adults and elderly patients ED  
239 accesses declined by 62.9% and 64.0%, respectively (Table 3 [Suppl mat]).

240 For what concerns triage severity codes of non-COVID-19 patients, the 4 codes were affected by  
241 the pandemic similarly; as a matters of fact, a reduction regarded similarly the four triage codes  
242 (Figure 2) during the study periods (except for the flu period) if compared to the previous year, with  
243 the most important decrease (between 60% and 70%) observed during lockdown.

244 As for non-COVID ED visits for specific conditions (Figure 3), our analysis demonstrated a  
245 reduction which broadly affected all disease categories, ranging from 41% to 83% in the lockdown  
246 period (Figure 3). The decrease of ED visits was more pronounced for infectious and parasitic  
247 diseases (-83%), skin and subcutaneous tissue pathogenic conditions (-80%), and congenital  
248 anomalies (-78%) (Figure 3). A remarkable decrease in ED visits was also observed for conditions  
249 usually significantly impacting on BMA's EDs (data not shown), such as diseases of the  
250 cardiovascular system (-58%) as well as endocrine, nutritional and metabolic diseases (-63%).  
251 Specifically, the remarkable reduction in ED visits interested life-threatening illnesses, such as  
252 ischemic heart disease (-49.7%), intracranial hemorrhages (-33.3%) and ischemic cerebrovascular  
253 disorders (-45.8 %) (Table 4 [Suppl mat]). Lower reductions or a modest increase were recorded in  
254 complications of pregnancy, childbirth and the puerperium and some morbid conditions of perinatal

255 origin (+8% during pre-lockdown, -36% during lockdown, and -30% during post-lockdown period)  
256 (Figure 3).

257

## 258 **Hospitalizations**

259 Figure 1b shows hospitalizations trends in the study periods, which appears to be quite stable during  
260 year 2019 until the end of 2020 flu period. Similarly to ED visits trends, hospital admissions started  
261 to drop simultaneously with the exponential growth of the local SARS-CoV-2 case curve. The  
262 number of hospitalizations started to rise again during the lockdown period, but with a slower pace.

263 Joinpoint analysis showed that non-COVID hospitalizations significantly ( $p < 0.05$ ) declined  
264 between weeks eight and fourteen before the peak of incidence of COVID-19 cases, and moderately  
265 increased afterwards (Figure 1).

266 The overall reduction of hospitalizations was  $-46 \pm 1\%$  during the lockdown period compared to  
267 previous year (Table 2 [Suppl mat]). Admissions to all hospital departments declined during and  
268 after lockdown (Table 1). During lockdown, admissions reduction was significant and interested  
269 likewise surgical and medical departments ( $-36.0\%$ ) as well as ICUs ( $-36.4\%$ ).

270

## 271 **Mortality**

272 The trend of non-COVID-19 mortality was similar in 2019 and 2020, with a slight decline after the  
273 winter season (Figure 1c).

274 A small increase in all-cause overall mortality (7.5%) was observed only during lockdown (IRR  
275 1.074,  $p < 0.05$ , 95%CI [1.007-1.145]) (table 2), whereas in both pre- and post-lockdown periods no  
276 significant change in mortality was detectable. Lockdown was associated with a significantly higher

277 cause-specific mortality related to endocrine, nutritional and metabolic diseases (47.9%, IRR 1.478,  
278  $p < 0.05$ , 95%CI [1.094-1.998]) and diseases of the circulatory system (15.5%, IRR 1.154,  $p < 0.05$ ,  
279 95%CI [1.031-1.291]). Conversely, mortality reduced only for infectious and parasitic diseases (-  
280 36.2%, IRR 0.638,  $p < 0.05$ , 95%CI [0.437-0.931]). As for mental, behavioral and neuro-  
281 developmental disorders, a significant increase in mortality during the pre-lockdown period was  
282 observed, while deaths for neoplasms decreased during the post-lockdown weeks (Table 2).

283 We found a significant increase in out-of-hospital mortality, particularly during the lockdown weeks  
284 (43.2%, IRR 1.428,  $p < 0.05$ , 95%CI [1.295-1.574]), whereas in the pre-lockdown period and in the  
285 post-lockdown period no remarkable changes were identified. A concurrent reduction of in-hospital  
286 mortality was observed (-15.0%, IRR 0.759,  $p < 0.05$ , 95%CI [0.694-0.831]).

287 Analysis of cause-specific out-of-hospital mortality (Table 2) confirmed an increase in deaths for  
288 neoplasms, endocrine, nutritional and metabolic diseases, and diseases of the circulatory systems  
289 during lockdown. Conversely, we found a significant reduction only in genitourinary disorders.

290

## 291 **Limitations**

292 This study has some limitations. First, mortality data might include under-diagnosed COVID-19  
293 cases. In fact the type of access and causes of death could have been coded incorrectly. However  
294 this is unavoidable due to the case definition and the context of that time-period, when the  
295 pandemic disruptively changed routine practice. Furthermore, considering the delayed onset of the  
296 pandemic in BMA and the preparedness efforts of local healthcare authorities, compared to other  
297 Italian areas earlier affected, we assume that no significant underestimation of COVID-19 deaths  
298 occurred, and that just a minority of COVID-19 deaths occurred out of the hospital, given that the  
299 vast majority of severely symptomatic COVID-19 patients had been hospitalized.

300 Furthermore, we had access to cause-specific mortality data, but only aggregated into broad  
301 categories (e.g. death for cardiovascular diseases, death for injury or poisoning, etc.). Data on more  
302 specific causes of death are still not available and therefore no conclusions can be drawn on more  
303 specific causes of death.

304 Finally, the short time window of the post-lockdown period considered in this study does not allow  
305 us to generalize our findings regarding possible medium and long term effects of the pandemic.  
306 Additional data are necessary to understand the effects of diagnostic and therapeutic delays that the  
307 pandemic has inevitably entailed, both for chronic and for acute patients.

308

309

## 310 **Discussion**

311 Globally, Italy has been the first Western country to experience the disruptive effect of the pandemic  
312 in terms of cases, deaths and the related burden on healthcare services.<sup>1,2,3,10</sup> Since the beginning of  
313 the pandemic, a reduction of ED visits and hospitalizations overall<sup>6</sup> and for specific  
314 diseases<sup>11,12,13,14,15</sup> have been reported worldwide.

315 In this paper we studied the pandemic consequences on non-COVID-19 patients in an area  
316 accounting for over one million inhabitants. We highlighted how ED visits and hospitalizations  
317 reduced overall, and particularly during the lockdown period. To the best of our knowledge, this is  
318 the first study to analyze also the trends of in- and out-of-hospital, all-cause and cause-specific  
319 mortality, providing a comprehensive picture of the short-term consequences of the pandemic on  
320 non-COVID-19 patients in Italy, the first hit European country.

321 Our findings indicate that the reduction of ED visits and hospitalizations started two weeks before  
322 the beginning of the national lockdown, after school closures and the first Italian case hospitalized

323 for COVID-19 in Codogno<sup>1</sup>, when no cases of local transmission had been still recorded in BMA.  
324 As already reported<sup>2,6,18,19,20</sup>, a possible explanation is that the population response is likely to be  
325 more affected by the national level authority risk message than the real local situation.<sup>21</sup> Several  
326 possible reasons have been put forward to explain, at least partially, a reduction in ED visits and  
327 hospitalizations.<sup>6,7</sup> In addition to pathologies likely reduced by the lockdown and lifestyle changes,  
328 this may have been caused by fear of the contagion, as well as by media campaigns encouraging to  
329 “stay at home”, together with the increasingly stringent lockdown measures and postponement of  
330 elective procedures, or the sense of civic responsibility of the population.<sup>7</sup>

331 It should be highlighted that not all ED visits represent real emergencies, and inappropriate accesses  
332 to ED are a well-known issue related to several reasons.<sup>7,20,22,23</sup> That being said, the observed  
333 reduction of the less severe triage codes was to somewhat expected, although not to this large  
334 extent. What we were not prepared for was the concurrent decrease of the most serious cases.  
335 Furthermore, we showed how ED visits’ reduction encompassed all pathological conditions, thus  
336 including also acute and time-dependent diseases, similarly to what already reported in  
337 literature<sup>24,25,26</sup>. The overall reduction of ED visits, regardless of age, severity, and causes, suggests  
338 the system’s inability to guide the patient in discriminating the real need for urgent care. Therefore,  
339 public awareness should be taken into due consideration to be prepared for a recrudescence of the  
340 pandemic.

341 A clear reduction of non-COVID-19 patients hospitalization has also been recorded, both for  
342 medical and surgical diseases and for conditions requiring intensive care support. Data on hospital  
343 admissions reported in previous studies<sup>6,12</sup> appear to be not comparable, as obtained from selected  
344 populations<sup>12</sup> or different healthcare systems, such as U.S. care system or other insurance-based  
345 systems.<sup>6</sup> In fact, unlike the U.S., the Italian National Healthcare Service is a single-payer system

346 funded by general taxation, similarly to the UK national health service.<sup>27</sup> This could have an impact  
347 on a system's hospitalization rate.<sup>28</sup>

348 Looking at the post-lockdown period, when the spread of COVID-19 was contained, we expected to  
349 see a progressive increase in ED visits and a consequent increase in hospitalizations, as a  
350 consequence of the delay in obtaining medical attention and care access due to lockdown. However,  
351 even if these indicators started to rise during the lockdown weeks and throughout the post-lockdown  
352 period, they did not reach the pre-pandemic levels.

353 The all-cause mortality among non-COVID-19 patients showed only a minimal increase (+7.5%)  
354 during the lockdown period. The significant increase in mortality for cardiovascular and endocrine  
355 systems' diseases that we have registered during lockdown is in line with other studies.<sup>24,25,26,29</sup>

356 The key finding of our study is that, with the sudden drop of ED visits and hospitalizations, we  
357 found a statistically significant increase of out-of-hospital all-cause mortality, mainly driven by an  
358 increase in deaths for neoplasms, cardiovascular diseases and endocrine, nutritional and metabolic  
359 diseases. In-hospital mortality instead showed an opposite and decreasing trend, due to the  
360 reduction of non-COVID-19 patients in healthcare facilities. We assume that these data are  
361 attributable to a delay in seeking hospital care and to system's inability in providing the same  
362 standards of care during a public health emergency, both in terms of quality and quantity. Our  
363 findings confirm those reported by Walker, L.E et al.<sup>30</sup> related to a multi-hospital system, in which  
364 an increase of non-COVID-related overall mortality was found to be mainly driven by out-of-  
365 hospital deaths, due to patients deferring care.

366 During the pre-lockdown weeks, we observed a significant increase in mortality for mental  
367 diseases. This might be due to the sense of fear and anxiety which reigned during the pre-lockdown  
368 period, with a consequent exacerbation of mental disorders.<sup>31,32</sup> The reduction in overall mortality  
369 for neoplasms during the post-lockdown weeks, when considered together with the increased out-



370 of-hospital mortality for the same cause recorded in the lockdown period, likely needs to be  
371 analyzed when medium- and long-term data will be available.

372 These data suggest that all-cause and cause-specific out-of-hospital mortality might be considered a  
373 useful indicator for targeting the consequences of the pandemic on non-COVID-19 patients.

374

375 In summary, our analysis showed a clear reduction of ED visits and hospitalizations for non-  
376 COVID-19 patients during the first months of the pandemic in a wide and populated area, and a  
377 significant increase in non-COVID-19 out-of-hospital deaths.

378 Out-of-hospital mortality due to neoplasms, cardiovascular and endocrine systems' diseases showed  
379 a significant increase during the lockdown weeks, while for other conditions the consequences of  
380 the pandemic on non-COVID-19 patients are still unknown.

381 During the first COVID-19 wave, the reduction in ED visits and hospitalization probably eased the  
382 healthcare system in facing an unprecedented emergency. In view of the recurrence of the crisis, the  
383 scenario described by our study represents a teachable moment about population and healthcare  
384 systems' response at the early stages of the pandemic in terms of reduced demand of care and  
385 systems' capability in intercepting it. According to our findings, we also advocate the need for  
386 further investigations into the medium and long term effects of the pandemic on non-COVID-19  
387 patients, in order to strengthen population awareness and systems' preparedness.

388

389

390 **References**

- 391 1 Odone A, Delmonte D, Scognamiglio T, et al. COVID-19 deaths in Lombardy, Italy: data in  
392 context *Lancet Public Health*. 2020;**5**(6):e310. doi:10.1016/S2468-2667(20)30099-2
- 393 2 Patterns of COVID-19 related excess mortality in the municipalities of Northern Italy  
394 Dino Gibertoni, Kadjo Yves Cedric Adja, Davide Golinelli, et al. medRxiv 2020.05.11.20097964;  
395 doi: <https://doi.org/10.1101/2020.05.11.20097964>
- 396 3 Lavezzo E, Franchin E, Ciavarella C, et al. Suppression of a SARS-CoV-2 outbreak in the  
397 Italian municipality of Vo'. *Nature*. 2020;**584**(7821):425-429. doi:10.1038/s41586-020-2488-1
- 398 4 Italian Civil Protection Department, "COVID-19: Situazione Italia" Dashboard URL  
399 [https://opendatadpc.maps.arcgis.com/apps/opsdashboard/index.html#/b0c68bce2cce478eaac82fe38](https://opendatadpc.maps.arcgis.com/apps/opsdashboard/index.html#/b0c68bce2cce478eaac82fe38d4138b1)  
400 [d4138b1](https://opendatadpc.maps.arcgis.com/apps/opsdashboard/index.html#/b0c68bce2cce478eaac82fe38d4138b1) (accessed 10.14.20)
- 401 5 Wang D, Hu B, Hu C, et al. Clinical Characteristics of 138 Hospitalized Patients With 2019  
402 Novel Coronavirus-Infected Pneumonia in Wuhan, China. *JAMA*. 2020;**323**(11):1061-1069.  
403 doi:10.1001/jama.2020.1585
- 404 6 Jeffery MM, D'Onofrio G, Paek H, et al. Trends in Emergency Department Visits and  
405 Hospital Admissions in Health Care Systems in 5 States in the First Months of the COVID-19  
406 Pandemic in the US [published online ahead of print, 2020 Aug 3]. *JAMA Intern Med*.  
407 2020;**180**(10):1328-1333. doi:10.1001/jamainternmed.2020.3288
- 408 7 Rosenbaum L. The Untold Toll - The Pandemic's Effects on Patients without Covid-19. *N*  
409 *Engl J Med*. 2020;**382**(24):2368-2371. doi:10.1056/NEJMms2009984
- 410 8 Emilia-Romagna Region Statistics Office [online] [https://statistica.regione.emilia-](https://statistica.regione.emilia-romagna.it/servizi-online/statistica-self-service/popolazione/popolazione-residente-dal-1861)  
411 [romagna.it/servizi-online/statistica-self-service/popolazione/popolazione-residente-dal-1861](https://statistica.regione.emilia-romagna.it/servizi-online/statistica-self-service/popolazione/popolazione-residente-dal-1861)  
412 (accessed 10.14.20)
- 413 9 Kim HJ, Fay MP, Feuer EJ, et al. Permutation tests for joinpoint regression with  
414 applications to cancer rates [published correction appears in *Stat Med* 2001 Feb 28;20(4):655]. *Stat*

- 415 *Med.* 2000;**19**(3):335-351. doi:10.1002/(sici)1097-0258(20000215)19:3<335::aid-sim336>3.0.co;2-  
416 z
- 417 10 Van Damme W, Dahake R, Delamou A, et al. The COVID-19 pandemic: diverse contexts;  
418 different epidemics-how and why?. *BMJ Glob Health.* 2020;**5**(7):e003098. doi:10.1136/bmjgh-  
419 2020-003098
- 420 11 Tartari F, Guglielmo A, Fuligni F, et al. Changes in emergency service access after spread of  
421 COVID-19 across Italy. *J Eur Acad Dermatol Venereol.* 2020;**34**(8):e350-e351.  
422 doi:10.1111/jdv.16553
- 423 12 Baum A, Schwartz MD. Admissions to Veterans Affairs Hospitals for Emergency  
424 Conditions During the COVID-19 Pandemic. *JAMA.* 2020;**324**(1):96-99.  
425 doi:10.1001/jama.2020.9972
- 426 13 Lazzerini M, Barbi E, Apicella A, et al. Delayed access or provision of care in Italy resulting  
427 from fear of COVID-19. *Lancet Child Adolesc Health.* 2020;**4**(5):e10-e11. doi:10.1016/S2352-  
428 4642(20)30108-5
- 429 14 Ferrero F, Ossorio MF, Torres FA, et al. Impact of the COVID-19 pandemic in the  
430 paediatric emergency department attendances in Argentina. *Arch Dis Child.* 2020;archdischild-  
431 2020-319833. doi:10.1136/archdischild-2020-319833
- 432 15 Schwarz V, Mahfoud F, Lauder L, et al. Decline of emergency admissions for cardiovascular  
433 and cerebrovascular events after the outbreak of COVID-19 [published online ahead of print, 2020  
434 Aug 4]. *Clin Res Cardiol.* 2020;**1-7**. doi:10.1007/s00392-020-01688-9
- 435 16 Weber EJ, Hirst E, Marsh M. The patient's dilemma: attending the emergency department  
436 with a minor illness. *BMJ.* 2017;**357**:j1941. Published 2017 Apr 27. doi:10.1136/bmj.j1941
- 437 17 Buonanno P, Galletta S, Puca M. Estimating the severity of COVID-19: Evidence from the  
438 Italian epicenter. *PLoS One.* 2020;**15**(10):e0239569. Published 2020 Oct 1.  
439 doi:10.1371/journal.pone.0239569

- 440 18 Blangiardo M, Cameletti M, Pirani M, et al. Estimating weekly excess mortality at sub-  
441 national level in Italy during the COVID-19 pandemic. *PLoS One*. 2020;**15**(10):e0240286.  
442 Published 2020 Oct 9. doi:10.1371/journal.pone.0240286
- 443 19 Mafham MM, Spata E, Goldacre R, et al. COVID-19 pandemic and admission rates for and  
444 management of acute coronary syndromes in England. *Lancet*. 2020;**396**(10248):381-389.  
445 doi:10.1016/S0140-6736(20)31356-8
- 446 20 Kraaijvanger N, van Leeuwen H, Rijpsma D, et al. Motives for self-referral to the  
447 emergency department: a systematic review of the literature. *BMC Health Serv Res*.  
448 2016;**16**(1):685. Published 2016 Dec 9. doi:10.1186/s12913-016-1935-z
- 449 21 Westgard BC, Morgan MW, Vazquez-Benitez G, et al. An Analysis of Changes in  
450 Emergency Department Visits After a State Declaration During the Time of COVID-19. *Ann Emerg*  
451 *Med*. 2020;**76**(5):595-601. doi:10.1016/j.annemergmed.2020.06.019
- 452 22 Sancton K, Sloss L, Berkowitz J, et al. Low-acuity presentations to the emergency  
453 department: Reasons for and access to other health care providers before presentation. *Can Fam*  
454 *Physician*. 2018;**64**(8):e354-e360.
- 455 23 Chaiyachati K, Kangovi S. Inappropriate ED visits: patient responsibility or an attribution  
456 bias?. *BMJ Qual Saf*. 2020;**29**(6):441-442. doi:10.1136/bmjqs-2019-009729
- 457 24 De Filippo O, D'Ascenzo F, Angelini F, et al. Reduced Rate of Hospital Admissions for  
458 ACS during Covid-19 Outbreak in Northern Italy. *N Engl J Med*. 2020;**383**(1):88-89.  
459 doi:10.1056/NEJMc2009166
- 460 25 Solomon MD, McNulty EJ, Rana JS, et al. The Covid-19 Pandemic and the Incidence of  
461 Acute Myocardial Infarction. *N Engl J Med*. 2020;**383**(7):691-693. doi:10.1056/NEJMc2015630
- 462 26 Wu J, Mamas MA, Mohamed MO, et al. Place and causes of acute cardiovascular mortality  
463 during the COVID-19 pandemic [published online ahead of print, 2020 Sep 28]. *Heart*.  
464 2020;heartjnl-2020-317912. doi:10.1136/heartjnl-2020-317912

- 465 27 Golinelli D, Toscano F, Bucci A, et al. Health Expenditure and All-Cause Mortality in the  
466 'Galaxy' of Italian Regional Healthcare Systems: A 15-Year Panel Data Analysis. *Appl Health Econ*  
467 *Health Policy*. 2017;**15**(6):773-783. doi:10.1007/s40258-017-0342-x
- 468 28 Brown LD. Comparing health systems in four countries: lessons for the United States. *Am J*  
469 *Public Health*. 2003;**93**(1):52-56. doi:10.2105/ajph.93.1.52
- 470 29 Baldi E, Sechi GM, Mare C, et al. Out-of-Hospital Cardiac Arrest during the Covid-19  
471 Outbreak in Italy. *N Engl J Med*. 2020;**383**(5):496-498. doi:10.1056/NEJMc2010418
- 472 30 Walker, L.E. et al. 4 Impact of the SARS-CoV-2 Pandemic on Emergency Department  
473 Presentations in an Integrated Health System, *Annals of Emergency Medicine*. 2020;**76** (4), S2 - S3.  
474 doi:10.1016/j.annemergmed.2020.09.014
- 475 31 Hoyer C, Ebert A, Szabo K, et al. Decreased utilization of mental health emergency service  
476 during the COVID-19 pandemic [published online ahead of print, 2020 Jun 9]. *Eur Arch Psychiatry*  
477 *Clin Neurosci*. 2020;1-3. doi:10.1007/s00406-020-01151-w
- 478 32 Moreno C, Wykes T, Galderisi S, et al. How mental health care should change as a  
479 consequence of the COVID-19 pandemic. *Lancet Psychiatry*. 2020;**7**(9):813-824.  
480 doi:10.1016/S2215-0366(20)30307-2
